# Supplementary material for: Synthesis and structural characterization of the heavy tricysteinylpnictines, models of protein-bound As(iii), Sb(iii), and Bi(iii)
Source: Royal Society of Chemistry journal article supplement (doi:10.1039/d4dt02476a), 2024-01-01
Supplement: d4dt02476a1.pdf [file d4dt02476a1.pdf]

Electronic Supplementary Information for

**Synthesis and structural characterization of the  
heavy tricysteinylnictines, models of protein-  
bound As(III), Sb(III), and Bi(III)**

*Sophia E. Hollow<sup>a</sup> and Timothy C. Johnstone\*<sup>a</sup>*

<sup>a</sup> Department of Chemistry and Biochemistry, University of California Santa Cruz, Santa Cruz,

California 95064, United States.

Correspondence: [johnstone@ucsc.edu](mailto:johnstone@ucsc.edu)

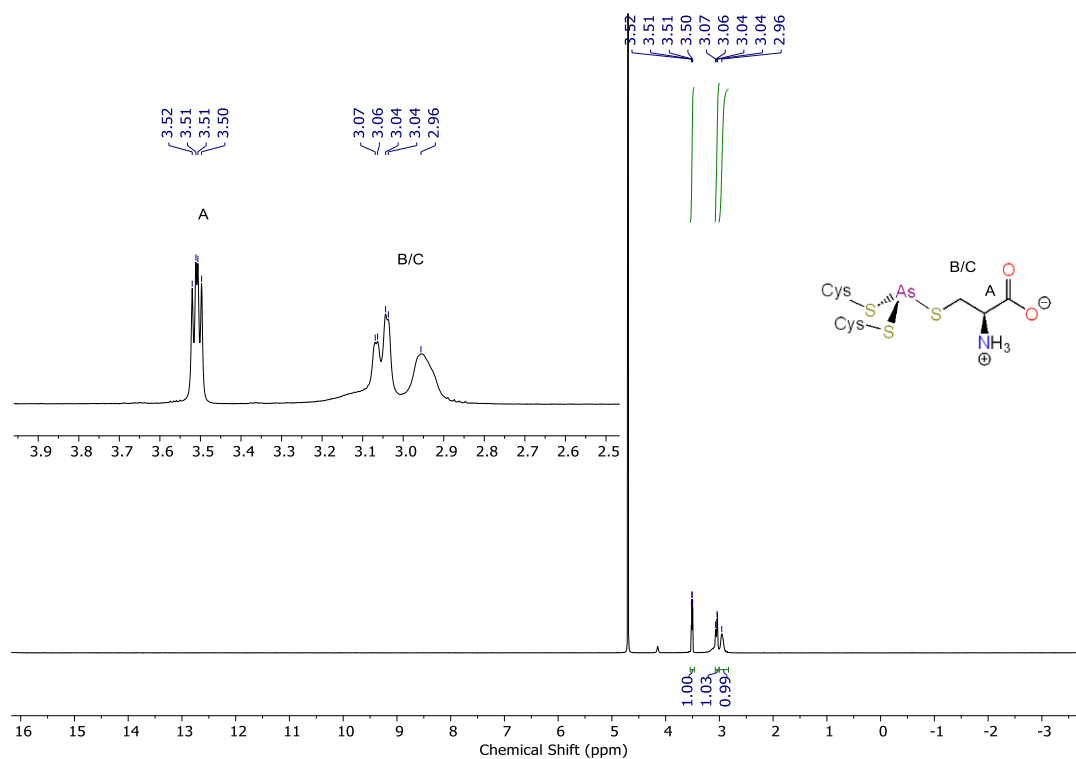

**Figure S1.**  $^1\text{H}$  NMR spectrum ( $\text{D}_2\text{O}$ , 500 MHz, 0.078 mM  $\text{Na}_2\text{CO}_3$ ) of  $\text{As}(\text{Cys})_3$  (0.015 mM).

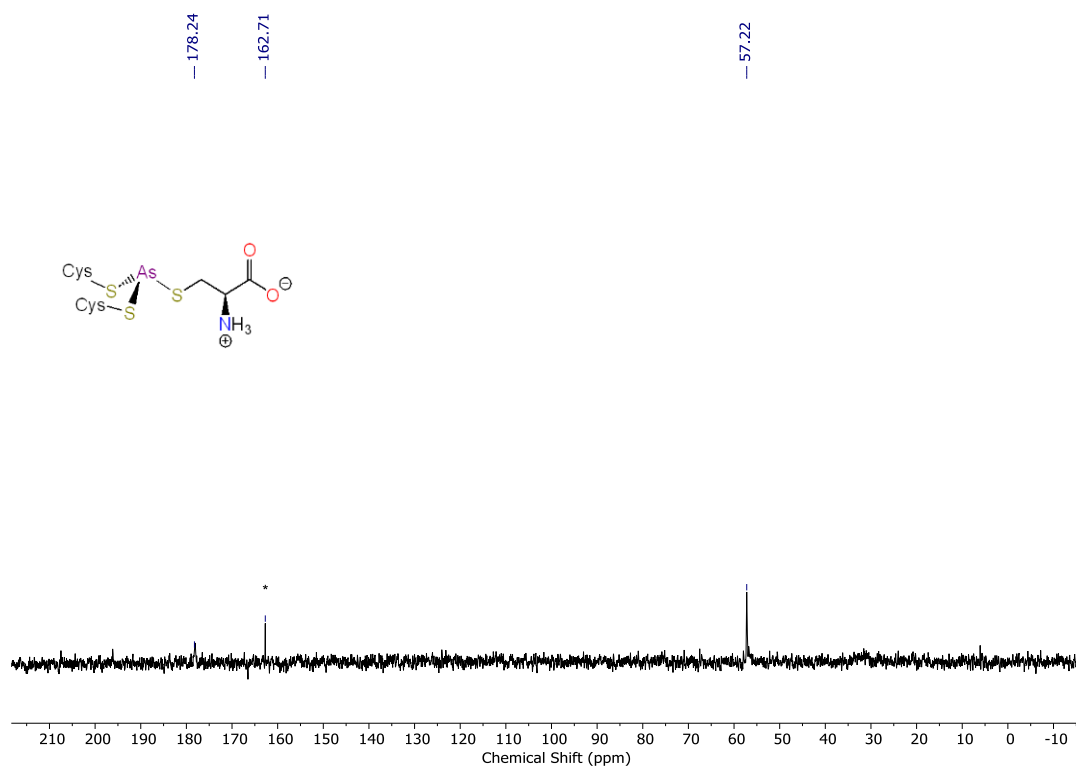

**Figure S2.**  $^{13}\text{C}\{^1\text{H}\}$  NMR spectrum ( $\text{D}_2\text{O}$ , 125 MHz, 0.078 mM  $\text{Na}_2\text{CO}_3$ ) of  $\text{As}(\text{Cys})_3$  (0.015 mM). The asterisk marks the carbonate/bicarbonate signal. The  $\text{C}_\beta$  signal is broadened by exchange to the point that it is not observed.

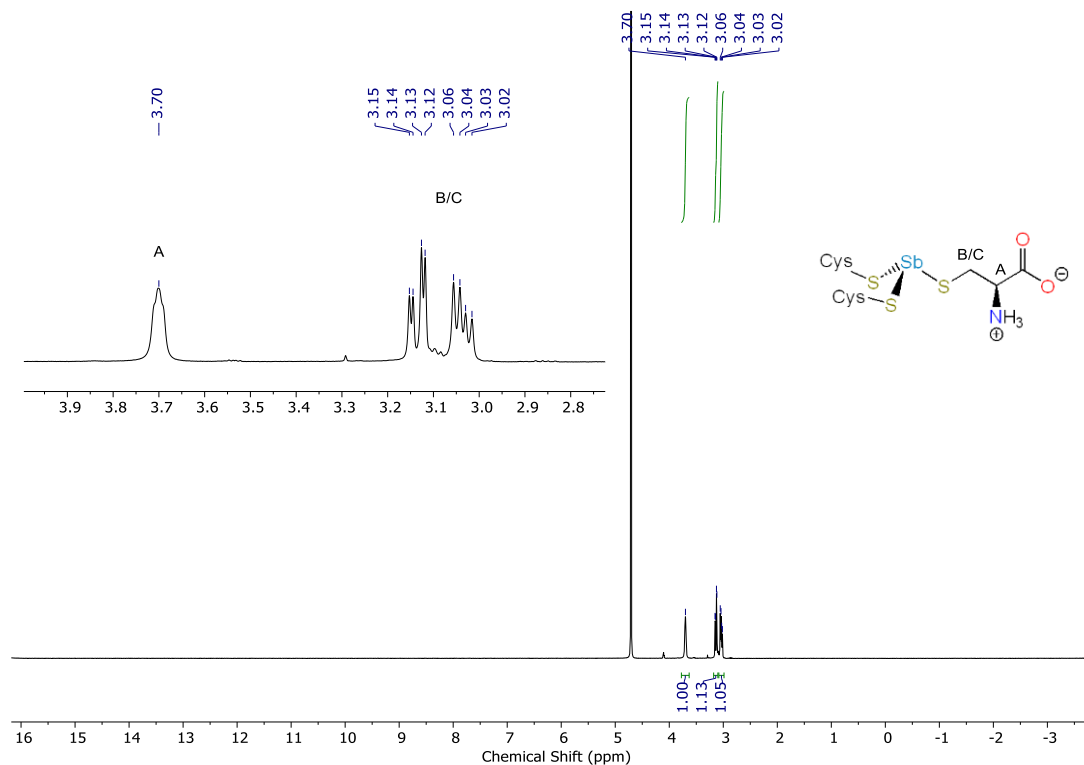

**Figure S3.**  $^1\text{H}$  NMR spectrum ( $\text{D}_2\text{O}$ , 500 MHz, 0.078 mM  $\text{Na}_2\text{CO}_3$ ) of  $\text{Sb}(\text{Cys})_3$  (0.015 mM).

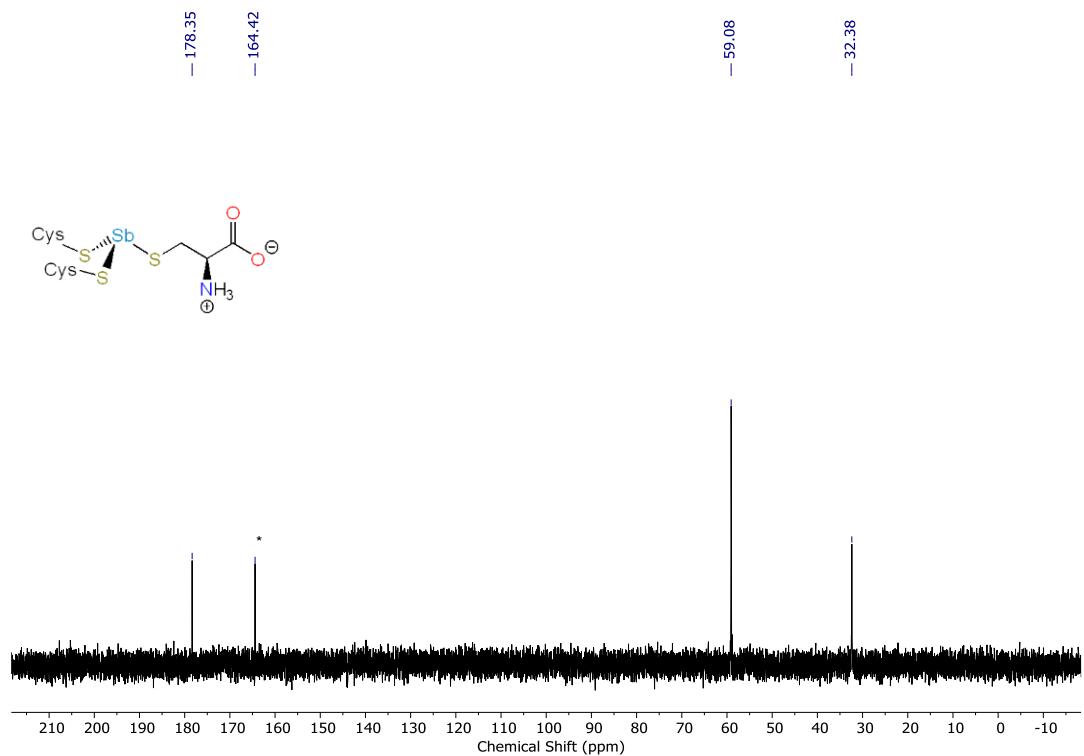

**Figure S4.**  $^{13}\text{C}\{^1\text{H}\}$  NMR spectrum ( $\text{D}_2\text{O}$ , 125 MHz, 0.078 mM  $\text{Na}_2\text{CO}_3$ ) of  $\text{Sb}(\text{Cys})_3$  (0.015 mM). The asterisk marks the carbonate/bicarbonate signal.

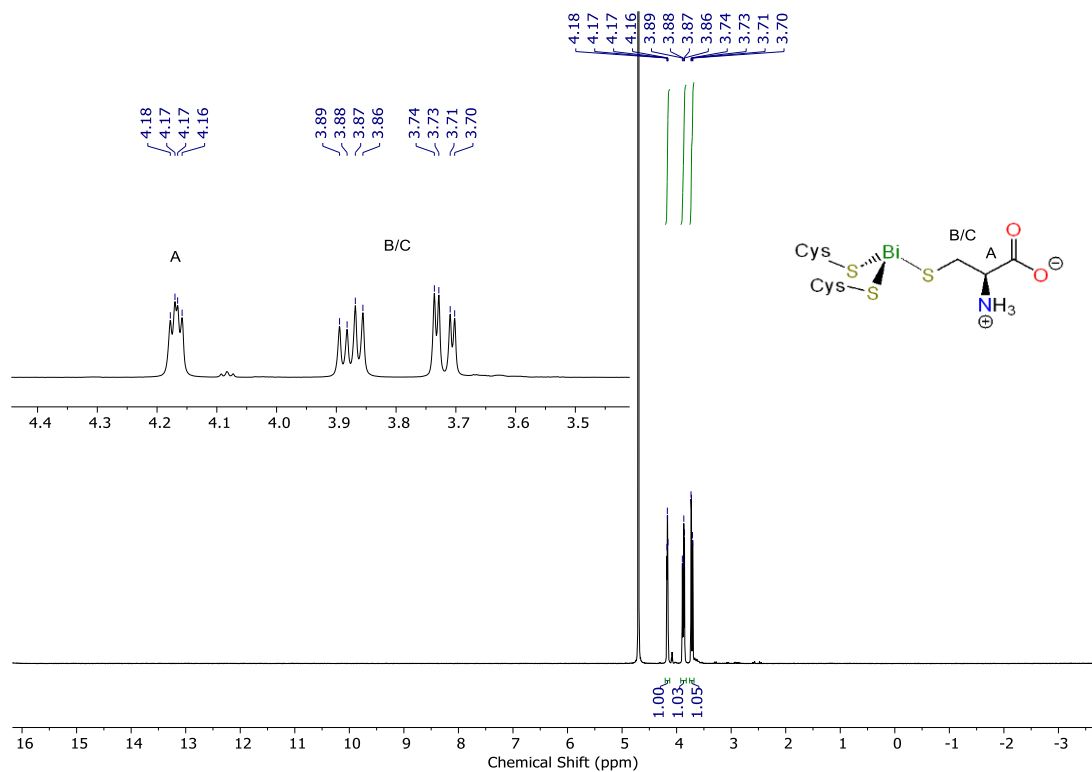

Figure S5.  $^1\text{H}$  NMR spectrum ( $\text{D}_2\text{O}$ , 500 MHz, 0.078 mM  $\text{Na}_2\text{CO}_3$ ) of  $\text{Bi}(\text{Cys})_3$  (0.015 mM).

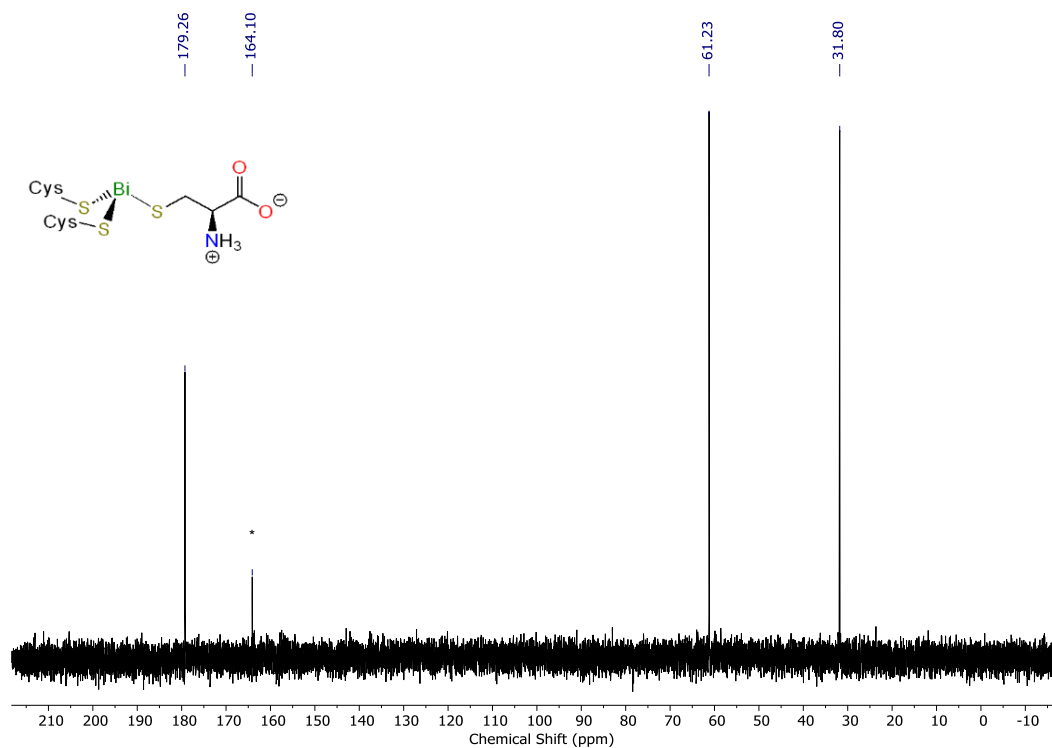

Figure S6.  $^{13}\text{C}\{^1\text{H}\}$  NMR spectrum ( $\text{D}_2\text{O}$ , 125 MHz, 0.078 mM  $\text{Na}_2\text{CO}_3$ ) of  $\text{Bi}(\text{Cys})_3$  (0.015 mM). The asterisk marks the carbonate/bicarbonate signal.

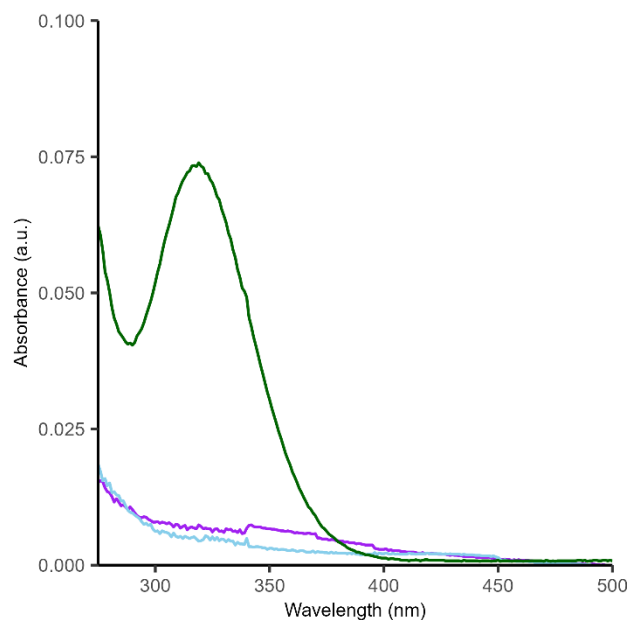

**Figure S7.** UV-Vis spectra for  $\text{Bi}(\text{Cys})_3$  (green),  $\text{Sb}(\text{Cys})_3$  (blue),  $\text{As}(\text{Cys})_3$  (purple). The concentration of the analyte was 30 nM and the sodium carbonate concentration was 156 nM.

**Table S1.** Refcodes for  $\text{Pn}(\text{SR})_3$  structures retrieved from the CSD.

| <b>As</b> | <b>Sb</b> | <b>Bi</b> |
|-----------|-----------|-----------|
| BALFAX    | BALGAY    | CIYPIK    |
| BALFEB    | CIDWIV    | IBEFIF    |
| BALFIF    | CUYKIQ    | IMIVEF    |
| BALFOL    | DALBAX    | MIWDUS    |
| BALFUR    | FATRIB    | MIWFEE    |
| CANWOG    | MTBTSB10  | OKIJUN    |
| CATJOW    | RALJUM    | OKOSAI    |
| CEDYOA    | RALKAT    | QEFVOO    |
| CUBVIE    | SIHKIE    | RIPRUE    |
| DEDLUT    | SIPZIB    | WATJUW    |
| ETUXUP    | SOPTOH    | WOXFOG    |
| FAQZUT    | SQNLB10   | XUNHOE    |
| FUWXAX    | TEPREL    | YUKRUR    |
| GEMCEI    | TIDGOC    | ZEKZEY    |
| HAMDIL    | TIDHAP    | ZUMSAB    |
| IBAYAM    | XUNJAS    | ZUMSEF    |
| KEKQOI    | YUPZER    |           |
| LAFBUS    | YUSFUN    |           |
| NEJQEZ    | ZAZYII    |           |
| NEJRAW    | ZAZYOO    |           |
| OGAYEB    |           |           |
| QENTEJ    |           |           |
| TUBCIG    |           |           |
| XUNHIY    |           |           |
